# Supplementary material for: Efficacy of targeted AKT inhibition in genetically engineered mouse models of PTEN-deficient prostate cancer
Source: PubMed Central journal article supplement (PMC4941290; doi:10.18632/oncotarget.7557), 2016-02-21
Supplement: oncotarget-07-15959-s001.pdf [file oncotarget-07-15959-s001.pdf]

# Efficacy of targeted AKT inhibition in genetically engineered mouse models of *PTEN*-deficient prostate cancer

## Supplementary Material

**A**

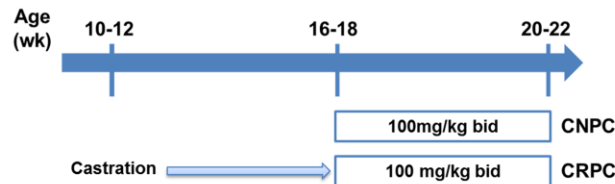

**B**

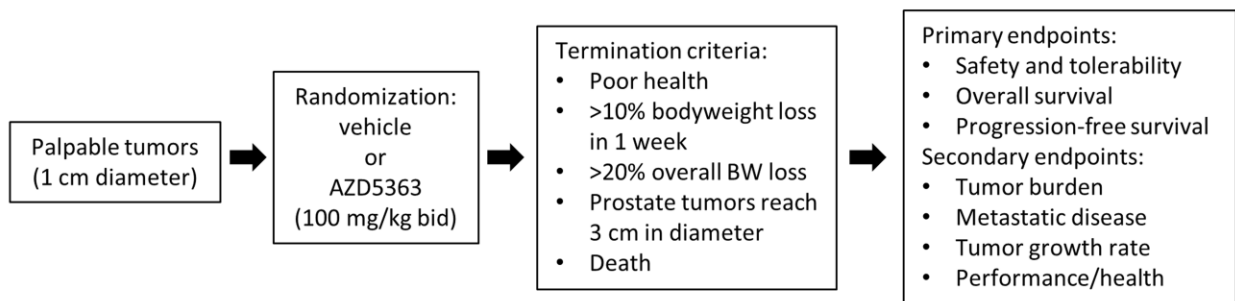

**Supplementary Figure S1. A.** The experimental design for a drug efficacy screen using *PTEN*-KO mice that harbor castration-naïve or castration resistant prostate tumors. **B.** Experimental design for late-stage disease using *PTEN/P53*-DKO mice.

**A**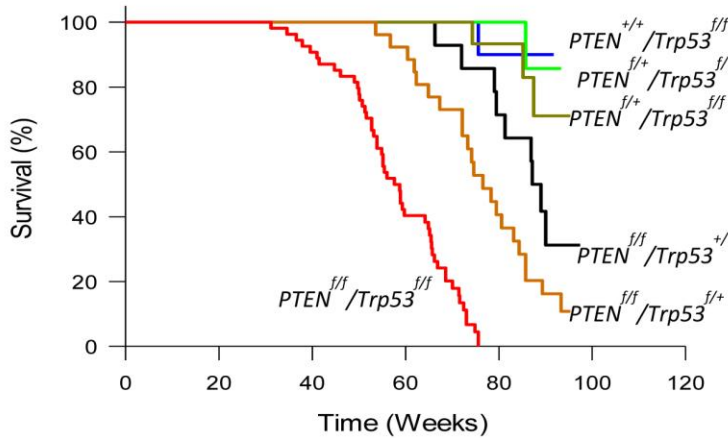**B**

Pairwise multiple comparisons for survival in conditional *PTEN* and *PTEN/Trp53* knockout mice

| Comparisons                                                                                                           | Statistic | Unadjusted |                |             |
|-----------------------------------------------------------------------------------------------------------------------|-----------|------------|----------------|-------------|
|                                                                                                                       |           | P Value    | Critical Level | Significant |
| <i>PTEN</i> <sup>f/+</sup> / <i>Trp53</i> <sup>f/f</sup> vs. <i>PTEN</i> <sup>f/f</sup> / <i>Trp53</i> <sup>f/f</sup> | 39.904    | 2.67E-10   | 0.00341        | Yes         |
| <i>PTEN</i> <sup>f/f</sup> / <i>Trp53</i> <sup>+/+</sup> vs. <i>PTEN</i> <sup>f/f</sup> / <i>Trp53</i> <sup>f/f</sup> | 34.845    | 3.57E-09   | 0.00366        | Yes         |
| <i>PTEN</i> <sup>+/+</sup> / <i>Trp53</i> <sup>f/f</sup> vs. <i>PTEN</i> <sup>f/f</sup> / <i>Trp53</i> <sup>f/f</sup> | 34.703    | 3.84E-09   | 0.00394        | Yes         |
| <i>PTEN</i> <sup>f/f</sup> / <i>Trp53</i> <sup>f/+</sup> vs. <i>PTEN</i> <sup>f/f</sup> / <i>Trp53</i> <sup>f/f</sup> | 31.937    | 1.59E-08   | 0.00427        | Yes         |
| <i>PTEN</i> <sup>f/+</sup> / <i>Trp53</i> <sup>f/+</sup> vs. <i>PTEN</i> <sup>f/f</sup> / <i>Trp53</i> <sup>f/f</sup> | 22.465    | 0.00000214 | 0.00465        | Yes         |
| <i>PTEN</i> <sup>f/+</sup> / <i>Trp53</i> <sup>f/f</sup> vs. <i>PTEN</i> <sup>f/f</sup> / <i>Trp53</i> <sup>f/+</sup> | 12.131    | 0.000496   | 0.00512        | Yes         |
| <i>PTEN</i> <sup>+/+</sup> / <i>Trp53</i> <sup>f/f</sup> vs. <i>PTEN</i> <sup>f/f</sup> / <i>Trp53</i> <sup>f/+</sup> | 11.64     | 0.000646   | 0.00568        | Yes         |
| <i>PTEN</i> <sup>f/+</sup> / <i>Trp53</i> <sup>f/+</sup> vs. <i>PTEN</i> <sup>f/f</sup> / <i>Trp53</i> <sup>f/+</sup> | 9.569     | 0.00198    | 0.00639        | Yes         |
| <i>PTEN</i> <sup>f/f</sup> / <i>Trp53</i> <sup>+/+</sup> vs. <i>PTEN</i> <sup>f/f</sup> / <i>Trp53</i> <sup>f/+</sup> | 4.1       | 0.0429     | 0.0073         | No          |
| <i>PTEN</i> <sup>f/f</sup> / <i>Trp53</i> <sup>+/+</sup> vs. <i>PTEN</i> <sup>+/+</sup> / <i>Trp53</i> <sup>f/f</sup> | 3.892     | 0.0485     | 0.00851        | No          |
| <i>PTEN</i> <sup>f/f</sup> / <i>Trp53</i> <sup>+/+</sup> vs. <i>PTEN</i> <sup>f/+</sup> / <i>Trp53</i> <sup>f/+</sup> | 3.453     | 0.0631     | 0.0102         | No          |
| <i>PTEN</i> <sup>f/f</sup> / <i>Trp53</i> <sup>+/+</sup> vs. <i>PTEN</i> <sup>f/+</sup> / <i>Trp53</i> <sup>f/f</sup> | 2.441     | 0.118      | 0.0127         | No          |
| <i>PTEN</i> <sup>+/+</sup> / <i>Trp53</i> <sup>f/f</sup> vs. <i>PTEN</i> <sup>f/+</sup> / <i>Trp53</i> <sup>f/f</sup> | 0.544     | 0.461      | 0.017          | No          |
| <i>PTEN</i> <sup>f/+</sup> / <i>Trp53</i> <sup>f/+</sup> vs. <i>PTEN</i> <sup>f/+</sup> / <i>Trp53</i> <sup>f/f</sup> | 0.487     | 0.485      | 0.0253         | No          |
| <i>PTEN</i> <sup>+/+</sup> / <i>Trp53</i> <sup>f/f</sup> vs. <i>PTEN</i> <sup>f/+</sup> / <i>Trp53</i> <sup>f/+</sup> | 0.00489   | 0.944      | 0.05           | No          |

The Holm-Sidak method was used for all pairwise multiple comparisons.

**Supplementary Figure S2.** *P53* inactivation promotes lethality in mouse *PTEN*-deficient prostate cancer. **A.** Kaplan-Meier plots comparing cumulative survival between combinations of monoallelic and biallelic inactivation of *PTEN* and *P53* mediated by *PSA-Cre*. **B.** Pairwise statistical comparisons of **A.**

Supplementary Table S1. List of PCR primers used for genotyping

| Name           | Sequence                                        | Product sizes (bp)            |
|----------------|-------------------------------------------------|-------------------------------|
| <i>PSA-Cre</i> | sense (5' to 3')<br>GCCTATATCCCAAAGGAACAGAAG    | 330                           |
|                | antisense (5' to 3')<br>CCTTCCTCTAGGTCCTTAGGAGG |                               |
| <i>PTEN</i>    | sense (5' to 3')<br>CTCCTCTACTCCATTCTTCCC       | 5' LoxP: 335<br>Wildtype: 228 |
|                | antisense (5' to 3')<br>ACTCCCACCAATGAACAAAC    |                               |
| <i>TrP53</i>   | sense (5' to 3')<br>CACAAAAACAGGTTAAACCCA       | 5' LoxP: 370<br>Wildtype: 288 |
|                | antisense (5' to 3')<br>AGCACATAG GAGGCAGAGAC   |                               |

PCR reaction conditions were as follows: initial denaturation at 94°C for 1 min, 35-cycle amplification at 94 C for 25 s, 60 C for 30 s and 72 C for 45 s, followed by final extension at 72 C for 10 additional minutes.

Supplementary Table S2. List of antibodies used for western blot and IHC

| Name              | Manufacturer   | Cat#    | Source | Predicated Band size | Dilution for Western Blot | Dilution for IHC | Antigen retrieval method |
|-------------------|----------------|---------|--------|----------------------|---------------------------|------------------|--------------------------|
| Akt               | Cell Signaling | 9272    | Rabbit | 60                   | 1:1000                    | -                | -                        |
| p-Akt             | Cell Signaling | 4060    | Rabbit | 60                   | 1:1000                    | 1:100            | 10mM Citrate buffer      |
| Androgen receptor | Thermo         | RB-9030 | Rabbit | -                    | -                         | -                | -                        |
| Cleaved caspase-3 | Cell Signaling | 9661    | Rabbit | 17,19                | 1:1000                    | 1:2000           | Dako A.R.S               |
| 4E-BP1            | Cell Signaling | 9452    | Rabbit | 15-20                | 1:1000                    | -                | -                        |
| p-4E-BP1          | Cell Signaling | 2855    | Rabbit | 15-20                | 1:1000                    | -                | -                        |
| Erk               | Cell Signaling | 9102    | Rabbit | 42,44                | 1:2000                    | -                | -                        |
| p-Erk             | Cell Signaling | 4370    | Rabbit | 42,44                | 1:2000                    | 1:100            | Dako A.R.S               |
| FOXO1             | Cell Signaling | 2880    | Rabbit | 72-82                | 1:1000                    | -                | -                        |
| p-FOXO1 (Ser256)  | Cell Signaling | 9461    | Rabbit | 82                   | 1:1000                    | -                | -                        |
| GAPDH             | Cell Signaling | 2118    | Rabbit | 37                   | 1:25000                   | -                | -                        |
| GSK-3 $\beta$     | Cell Signaling | 9315    | Rabbit | 46                   | 1:1000                    | -                | -                        |
| p-GSK-3 $\beta$   | Cell Signaling | 9336    | Rabbit | 46                   | 1:1000                    | -                | -                        |
| Ki67              | Thermo         | RB-9043 | Rabbit | -                    | -                         | 1:100            | Dako A.R.S               |
| S6                | Cell Signaling | 2217    | Rabbit | 32                   | 1:2000                    | -                | -                        |
| p-S6              | Cell Signaling | 2211    | Rabbit | 32                   | 1:2000                    | 1:100            | Dako A.R.S               |
| PCNA              | Thermo         | RB-9055 | Rabbit | 36                   | 1:1000                    | -                | -                        |
| Stat3             | Cell Signaling | 4904    | Rabbit | 79,86                | 1:1000                    | -                | -                        |
| p-Stat3 (Tyr705)  | Cell Signaling | 9145    | Rabbit | 79,86                | 1:1000                    | 1:100            | Dako A.R.S               |
| p-Stat3 (SerY727) | Cell Signaling | 9134    | Rabbit | 79,86                | 1:1000                    | -                | -                        |

A.R.S., antigen retrieval solution; IHC, immunohistochemistry
